# Supplementary material for: Hsp90 inhibition as a means to inhibit activation of the NLRP3 inflammasome
Source: PubMed Central journal article supplement (PMC5928092; doi:10.1038/s41598-018-25123-2), 2018-04-30
Supplement: 41598_2018_25123_MOESM1_ESM.pdf [file 41598_2018_25123_MOESM1_ESM.pdf]

## **Hsp90 inhibition as a means to inhibit activation of the NLRP3 inflammasome**

Niina Piippo<sup>1</sup>, Eveliina Korhonen<sup>1</sup>, Maria Hytti<sup>1</sup>, Heli Skottman<sup>2</sup>, Kati Kinnunen<sup>3</sup>, Natasha Josifovska<sup>4</sup>, Goran Petrovski<sup>4,5</sup>, Kai Kaarniranta<sup>3,6</sup>, Anu Kauppinen<sup>1,\*</sup>

<sup>1</sup>School of Pharmacy, University of Eastern Finland, Kuopio, 70211, Finland

<sup>2</sup>Faculty of Medicine and Life Sciences, BioMediTech, University of Tampere, Tampere, 33014, Finland

<sup>3</sup>Department of Ophthalmology, Kuopio University Hospital, Kuopio, 70211, Finland

<sup>4</sup>Stem Cells and Eye Research Laboratory, Department of Ophthalmology, Faculty of Medicine, Albert Szent-Györgyi Clinical Center, University of Szeged, Szeged, Hungary

<sup>5</sup>Center for Eye Research, Department of Ophthalmology, Oslo University Hospital, University of Oslo, Oslo, Norway

<sup>6</sup>Department of Ophthalmology, Institute of Clinical Medicine, University of Eastern Finland, Kuopio, 70211, Finland

**\*Corresponding author:** Anu Kauppinen, School of Pharmacy, Faculty of Health Sciences, University of Eastern Finland, P.O. Box 1627, FIN-70211 Kuopio, Finland, Fax: +358 17 162048, Tel.: +358 40 3553216, e-mail: [anu.kauppinen@uef.fi](mailto:anu.kauppinen@uef.fi)

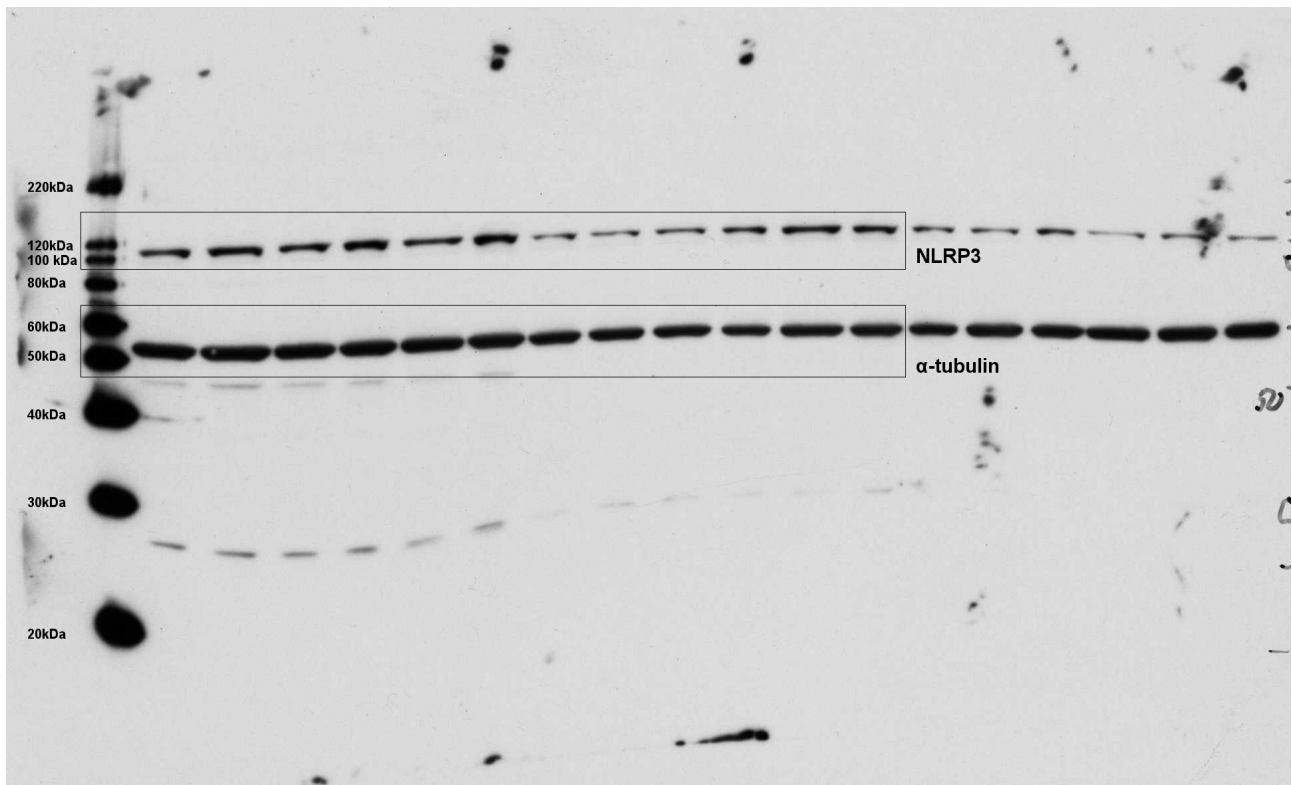

**Supplementary Figure 1.** Scan of the complete blot represented in Figure 5. NLRP3 and  $\alpha$ -tubulin, as an internal control, were detected from the same blot. Boxes indicate the cropped lanes shown in Figure 5.
